# Supplementary material for: Identification of a Specific Plasma Sphingolipid Profile in a Group of Normal-Weight and Obese Subjects: A Novel Approach for a “Biochemical” Diagnosis of Metabolic Syndrome?
Source: MDPI journal article supplement (doi:10.3390/ijms24087451), 2023-04-18
Supplement: s1 [file s1]

**Supplementary Figures S1-S2.** Boxplots represent, for each lipid class, the concentrations of all the species (i.e., sum) measured in the plasma of NW (n=30), OB-SIMET- (N=30) and OB-SIMET+ (n=24) subjects. Lipids of a same class were summed and then mediated within all subjects of the same class. The boxes represent data obtained in the range 25<sup>th</sup>–75<sup>th</sup> percentiles; the line across the boxes indicates the median value; the lines above and below the boxes indicate extreme values (10<sup>th</sup> or 90<sup>th</sup> percentile). Statistical significance was evaluated by Kruskal–Wallis’s one-way ANOVA test, followed by the *post-hoc* Dunn’s test for multiple comparisons (NW vs. OB-SIMET+ vs. OB-SIMET+). a: <0.05 vs. NW group; b: <0.05 vs. OB-SIMET-. For abbreviations see the article.

**Supplementary Figures S3-S4-S5.** Boxplots represent the median (25<sup>th</sup>-75<sup>th</sup> percentiles) of the single lipid species reported in Table 3 that showed a significant variation by Kruskal–Wallis’s one-way ANOVA test, followed by the *post-hoc* Dunn’s test for multiple comparisons (NW vs. OB-SIMET+ vs. OB-SIMET+). a: <0.05 vs. NW group; b: <0.05 vs. OB-SIMET-. For the abbreviations see the article.
